# Supplementary material for: CRISPR activation screen identifies BCL-2 proteins and B3GNT2 as drivers of cancer resistance to T cell-mediated cytotoxicity
Source: PubMed Central journal article supplement (PMC8956604; doi:10.1038/s41467-022-29205-8), 2022-03-25
Supplement: 41467_2022_29205_MOESM2_ESM.pdf [file 41467_2022_29205_MOESM2_ESM.pdf]

## Reporting Summary

Nature Portfolio wishes to improve the reproducibility of the work that we publish. This form provides structure for consistency and transparency in reporting. For further information on Nature Portfolio policies, see our [Editorial Policies](#) and the [Editorial Policy Checklist](#).

### Statistics

For all statistical analyses, confirm that the following items are present in the figure legend, table legend, main text, or Methods section.

n/a Confirmed

- |                                     |                                     |                                                                                                                                                                                                                                                            |
|-------------------------------------|-------------------------------------|------------------------------------------------------------------------------------------------------------------------------------------------------------------------------------------------------------------------------------------------------------|
| <input type="checkbox"/>            | <input checked="" type="checkbox"/> | The exact sample size ( $n$ ) for each experimental group/condition, given as a discrete number and unit of measurement                                                                                                                                    |
| <input type="checkbox"/>            | <input checked="" type="checkbox"/> | A statement on whether measurements were taken from distinct samples or whether the same sample was measured repeatedly                                                                                                                                    |
| <input type="checkbox"/>            | <input checked="" type="checkbox"/> | The statistical test(s) used AND whether they are one- or two-sided<br><i>Only common tests should be described solely by name; describe more complex techniques in the Methods section.</i>                                                               |
| <input checked="" type="checkbox"/> | <input type="checkbox"/>            | A description of all covariates tested                                                                                                                                                                                                                     |
| <input type="checkbox"/>            | <input checked="" type="checkbox"/> | A description of any assumptions or corrections, such as tests of normality and adjustment for multiple comparisons                                                                                                                                        |
| <input type="checkbox"/>            | <input checked="" type="checkbox"/> | A full description of the statistical parameters including central tendency (e.g. means) or other basic estimates (e.g. regression coefficient) AND variation (e.g. standard deviation) or associated estimates of uncertainty (e.g. confidence intervals) |
| <input type="checkbox"/>            | <input checked="" type="checkbox"/> | For null hypothesis testing, the test statistic (e.g. $F$ , $t$ , $r$ ) with confidence intervals, effect sizes, degrees of freedom and $P$ value noted<br><i>Give <math>P</math> values as exact values whenever suitable.</i>                            |
| <input checked="" type="checkbox"/> | <input type="checkbox"/>            | For Bayesian analysis, information on the choice of priors and Markov chain Monte Carlo settings                                                                                                                                                           |
| <input checked="" type="checkbox"/> | <input type="checkbox"/>            | For hierarchical and complex designs, identification of the appropriate level for tests and full reporting of outcomes                                                                                                                                     |
| <input type="checkbox"/>            | <input checked="" type="checkbox"/> | Estimates of effect sizes (e.g. Cohen's $d$ , Pearson's $r$ ), indicating how they were calculated                                                                                                                                                         |

*Our web collection on [statistics for biologists](#) contains articles on many of the points above.*

### Software and code

Policy information about [availability of computer code](#)

|                 |                                                                                                                                                                                                                                                                                                                                                                             |
|-----------------|-----------------------------------------------------------------------------------------------------------------------------------------------------------------------------------------------------------------------------------------------------------------------------------------------------------------------------------------------------------------------------|
| Data collection | TCGA2STAT 1.2                                                                                                                                                                                                                                                                                                                                                               |
| Data analysis   | MAGECK 0.5.7; g:Profiler (October 2, 2020); R 4.0.2; RSEM 1.3.1; GSEAPY 0.10.4; Bowtie 1.2.3; MACS 1.4.2; Python 2.7 and 3.7; FlowJo 10.8.1; Prism 8; Code for the analyses described in this study is available on Github ( <a href="https://github.com/fengzhanglab/Joung_Immunotherapy_Manuscript">https://github.com/fengzhanglab/Joung_Immunotherapy_Manuscript</a> ). |

For manuscripts utilizing custom algorithms or software that are central to the research but not yet described in published literature, software must be made available to editors and reviewers. We strongly encourage code deposition in a community repository (e.g. GitHub). See the Nature Portfolio [guidelines for submitting code & software](#) for further information.

### Data

Policy information about [availability of data](#)

All manuscripts must include a [data availability statement](#). This statement should provide the following information, where applicable:

- Accession codes, unique identifiers, or web links for publicly available datasets
- A description of any restrictions on data availability
- For clinical datasets or third party data, please ensure that the statement adheres to our [policy](#)

The sequencing data generated in this study has been deposited in the Gene Expression Omnibus under accession code GSE159540. The mass spectrometry proteomics data has been deposited to the ProteomeXchange Consortium via the PRIDE partner repository with the accession code PXD031532. The Cancer Genome Atlas datasets were downloaded from the Broad GDAC Firehose (<http://gdac.broadinstitute.org/>) using the TCGA2STAT package for R. The human hg38 genome was downloaded from the UCSC Genome Browser (<https://genome.ucsc.edu/>). The remaining data are available within the Article, Supplementary Information, or Source Data file.

## Field-specific reporting

Please select the one below that is the best fit for your research. If you are not sure, read the appropriate sections before making your selection.

Life sciences  Behavioural & social sciences  Ecological, evolutionary & environmental sciences

For a reference copy of the document with all sections, see [nature.com/documents/nr-reporting-summary-flat.pdf](https://www.nature.com/documents/nr-reporting-summary-flat.pdf)

## Life sciences study design

All studies must disclose on these points even when the disclosure is negative.

|                 |                                                                                                                                                                                                                                                                                                                                |
|-----------------|--------------------------------------------------------------------------------------------------------------------------------------------------------------------------------------------------------------------------------------------------------------------------------------------------------------------------------|
| Sample size     | No statistical methods were used to predetermine sample size. For each assay, sample size was determined based on variability across independent experiments.                                                                                                                                                                  |
| Data exclusions | No data were excluded.                                                                                                                                                                                                                                                                                                         |
| Replication     | Data represent experimental results that were reproduced at least once with either similar experimental setup or alternative assays.                                                                                                                                                                                           |
| Randomization   | For animal studies, mice were randomized into test and control groups with or without adoptive cell transfer right after subcutaneous tumor injection. Randomization is not relevant to other cell culture-based experiments. The same number of cells were used for the experiments and the experiments were well-controlled. |
| Blinding        | T cell injections were blinded between the test groups. While blinding to group allocation was not always possible due to COVID19 restrictions, the data collection and analysis were performed carefully by at least two different investigators.                                                                             |

## Reporting for specific materials, systems and methods

We require information from authors about some types of materials, experimental systems and methods used in many studies. Here, indicate whether each material, system or method listed is relevant to your study. If you are not sure if a list item applies to your research, read the appropriate section before selecting a response.

### Materials & experimental systems

| n/a                                 | Involved in the study                                           |
|-------------------------------------|-----------------------------------------------------------------|
| <input type="checkbox"/>            | <input checked="" type="checkbox"/> Antibodies                  |
| <input type="checkbox"/>            | <input checked="" type="checkbox"/> Eukaryotic cell lines       |
| <input checked="" type="checkbox"/> | <input type="checkbox"/> Palaeontology and archaeology          |
| <input type="checkbox"/>            | <input checked="" type="checkbox"/> Animals and other organisms |
| <input type="checkbox"/>            | <input checked="" type="checkbox"/> Human research participants |
| <input checked="" type="checkbox"/> | <input type="checkbox"/> Clinical data                          |
| <input checked="" type="checkbox"/> | <input type="checkbox"/> Dual use research of concern           |

### Methods

| n/a                                 | Involved in the study                              |
|-------------------------------------|----------------------------------------------------|
| <input type="checkbox"/>            | <input checked="" type="checkbox"/> ChIP-seq       |
| <input type="checkbox"/>            | <input checked="" type="checkbox"/> Flow cytometry |
| <input checked="" type="checkbox"/> | <input type="checkbox"/> MRI-based neuroimaging    |

## Antibodies

### Antibodies used

phospho- NF-kB p65 Ser536 (Cell Signaling Technology 3033S, 1:1,000), NF-kB p65 (Santa Cruz Biotechnology sc-8008, 1:200), phospho-STAT1 Tyr701 (Cell Signaling Technology 9167S, 1:1,000), STAT1 (Cell Signaling Technology 9172S, 1:1,000), CD276 (R&D Systems AF1027, 1:200), CD70 (Santa Cruz Biotechnology sc-365539, 1:200), CD58 (Thermo Fisher Scientific MA5800, 1:200), NECTIN2 (R&D Systems AF2229, 1:2,000), HLA A (Abcam ab52922, 1:5,000), TNFRSF1A (Santa Cruz Biotechnology sc-8436, 1:200), IFNGR2 (R&D Systems AF773, 1:200), FAS (Santa Cruz Biotechnology sc-8009, 1:200), IFNAR1 (Santa Cruz Biotechnology sc-7391, 1:100), TNFRSF10B (Novus Biologicals NB100-56618, 1:200), MICB (R&D Systems MAB1599-100, 1:500), TNFRSF10A (R&D Systems AF347, 1:200), PVR (R&D Systems MAB25301, 1:500), MICA (R&D Systems MAB1300-100, 1:500), HMGB1 (Abcam ab18256, 1:1,000), 4-1BBL (TNFSF9; R&D Systems AF2295, 1:200), NT5E (Abcam ab175396, 1:1,000), ULBP2 (R&D Systems AF1298, 1:2,000), IFNGR1 (R&D Systems MAB6731, 1:500), ULBP3 (R&D Systems AF1517, 1:2,000), CD39 (Abcam ab108248, 1:1,000), FLAG (Millipore Sigma F7425, 1:1,000), GAPDH (Cell Signaling Technology 2118L, 1:1,000), Anti-rabbit IgG-HRP (Cell Signaling Technology 7074S, 1:5,000), Anti-mouse IgG-HRP (Cell Signaling Technology 7076S, 1:5,000), anti-goat IgG-HRP (Santa Cruz Biotechnology sc-2354, 1:5,000), IgG Fc PE (Thermo Fisher Scientific 12-4998-82, 1:50), His Tag Alexa Fluor 647 (Thermo Fisher Scientific MA121315A647, 1:500), mouse Alexa Fluor 568 (Thermo Fisher Scientific A-11031, 1:400), or rabbit Alexa Fluor 647 (Thermo Fisher Scientific A-21244, 1:400)

### Validation

All antibodies used in this study were validated by the manufacturers. Validation statements and literature citations are available on the manufacturer's websites.  
 phospho- NF-kB p65 Ser536 (<https://www.cellsignal.com/products/primary-antibodies/phospho-nf-kb-p65-ser536-93h1-rabbit-mab/3033>)  
 NF-kB p65 (<https://www.scbt.com/p/nfkappab-p65-antibody-f-6>)  
 phospho-STAT1 Tyr701 (<https://www.cellsignal.com/products/primary-antibodies/phospho-stat1-tyr701-58d6-rabbit-mab/9167>)  
 STAT1 (<https://www.cellsignal.com/products/primary-antibodies/stat1-antibody/9172>)

CD276 ([https://www.rndsystems.com/products/human-b7-h3-antibody\\_af1027](https://www.rndsystems.com/products/human-b7-h3-antibody_af1027))  
 CD70 (<https://www.scbt.com/p/cd27l-antibody-g-7>)  
 CD58 (<https://www.thermofisher.com/antibody/product/CD58-Antibody-clone-TS2-9-Monoclonal/MA5800>)  
 NECTIN2 ([https://www.rndsystems.com/products/human-nectin-2-cd112-antibody\\_af2229](https://www.rndsystems.com/products/human-nectin-2-cd112-antibody_af2229))  
 HLA A (<https://www.abcam.com/hla-a-antibody-ep1395y-ab52922.html>)  
 TNFRSF1A (<https://www.scbt.com/p/tnf-r1-antibody-h-5>)  
 IFNGR2 ([https://www.rndsystems.com/products/human-ifn-gamma-r2-antibody\\_af773](https://www.rndsystems.com/products/human-ifn-gamma-r2-antibody_af773))  
 FAS (<https://www.scbt.com/p/fas-antibody-b-10>)  
 IFNAR1 (<https://www.scbt.com/p/ifn-alpha-beta-alpha-antibody-h-11>)  
 TNFRSF10B ([https://www.novusbio.com/products/trailr2-tnfrsf10b-antibody\\_nb100-56618](https://www.novusbio.com/products/trailr2-tnfrsf10b-antibody_nb100-56618))  
 MICB ([https://www.rndsystems.com/products/human-micb-antibody-236511\\_mab1599](https://www.rndsystems.com/products/human-micb-antibody-236511_mab1599))  
 TNFRSF10A ([https://www.rndsystems.com/products/human-trailr1-tnfrsf10a-antibody\\_af347](https://www.rndsystems.com/products/human-trailr1-tnfrsf10a-antibody_af347))  
 PVR ([https://www.rndsystems.com/products/human-cd155-pvr-antibody-300907\\_mab25301](https://www.rndsystems.com/products/human-cd155-pvr-antibody-300907_mab25301))  
 MICA ([https://www.rndsystems.com/products/human-mica-antibody-159227\\_mab1300](https://www.rndsystems.com/products/human-mica-antibody-159227_mab1300))  
 HMGB1 (<https://www.abcam.com/hmgb1-antibody-ab18256.html>)  
 4-1BBL (TNFSF9; [https://www.rndsystems.com/products/human-4-1bb-ligand-tnfsf9-antibody\\_af2295](https://www.rndsystems.com/products/human-4-1bb-ligand-tnfsf9-antibody_af2295))  
 NTSE (<https://www.abcam.com/cd73-antibody-ab175396.html>)  
 ULBP2 ([https://www.rndsystems.com/products/human-ulbp-2-5-6-antibody\\_af1298](https://www.rndsystems.com/products/human-ulbp-2-5-6-antibody_af1298))  
 IFNGR1 ([https://www.rndsystems.com/products/human-ifn-gamma-r1-cd119-antibody-92101\\_mab6731](https://www.rndsystems.com/products/human-ifn-gamma-r1-cd119-antibody-92101_mab6731))  
 ULBP3 ([https://www.rndsystems.com/products/human-ulbp-3-antibody\\_af1517](https://www.rndsystems.com/products/human-ulbp-3-antibody_af1517))  
 CD39 (<https://www.abcam.com/cd39-antibody-epr36782-ab108248.html>)  
 FLAG (<https://www.sigmaaldrich.com/US/en/product/sigma/f7425>)  
 GAPDH (<https://www.cellsignal.com/products/primary-antibodies/gapdh-14c10-rabbit-mab/2118>)

## Eukaryotic cell lines

Policy information about [cell lines](#)

|                                                                   |                                                                                                                                                                                                                                                                                                                                                                                                                                             |
|-------------------------------------------------------------------|---------------------------------------------------------------------------------------------------------------------------------------------------------------------------------------------------------------------------------------------------------------------------------------------------------------------------------------------------------------------------------------------------------------------------------------------|
| Cell line source(s)                                               | HEK293FT cells (Thermo Fisher Scientific R70007), A375 melanoma (Millipore Sigma 88113005-1VL), H1793 non-small cell lung adenocarcinoma (ATCC CRL-5896), H1299 non-small cell lung carcinoma (ATCC CRL-5803), LN-18 glioblastoma (ATCC CRL-2610), SK-N-AS neuroblastoma (ATCC CRL-2137), A2058 melanoma (ATCC CRL-11147), OAW28 ovarian cystadenocarcinoma (Millipore Sigma 85101601-1VL), SW1417 colorectal adenocarcinoma (ATCC CCL-238) |
| Authentication                                                    | Cell lines were obtained from manufacturers and not independently authenticated.                                                                                                                                                                                                                                                                                                                                                            |
| Mycoplasma contamination                                          | Cell lines were confirmed negative for mycoplasma contamination by both manufacturer and authors.                                                                                                                                                                                                                                                                                                                                           |
| Commonly misidentified lines (See <a href="#">ICLAC</a> register) | None of the cell lines used are listed in the ICLAC register                                                                                                                                                                                                                                                                                                                                                                                |

## Animals and other organisms

Policy information about [studies involving animals](#); [ARRIVE guidelines](#) recommended for reporting animal research

|                         |                                                                                                                                               |
|-------------------------|-----------------------------------------------------------------------------------------------------------------------------------------------|
| Laboratory animals      | Female NSG mice (strain 005557) aged 4-6 weeks were purchased from The Jackson Laboratory and used for tumor induction experiments.           |
| Wild animals            | study did not involve wild animals                                                                                                            |
| Field-collected samples | study did not involve field-collected samples                                                                                                 |
| Ethics oversight        | The designs of animal studies and procedures were approved by the Institutional Animal Care and Use Committee (IACUC) of the Broad Institute. |

Note that full information on the approval of the study protocol must also be provided in the manuscript.

## Human research participants

Policy information about [studies involving human research participants](#)

|                            |                                                                           |
|----------------------------|---------------------------------------------------------------------------|
| Population characteristics | T cells were isolated from anonymous human healthy donors.                |
| Recruitment                | Leukapheresis products were purchased from the MGH blood bank.            |
| Ethics oversight           | Institutional Review Board protocol of the Massachusetts General Hospital |

Note that full information on the approval of the study protocol must also be provided in the manuscript.

## ChIP-seq

### Data deposition

- Confirm that both raw and final processed data have been deposited in a public database such as [GEO](#).
- Confirm that you have deposited or provided access to graph files (e.g. BED files) for the called peaks.

#### Data access links

*May remain private before publication.*

We have deposited the FASTQ and BED files to GEO (GSE159540).

#### Files in database submission

FASTQ and BED files for N-term and C-term FLAG JUNB, input and ChIP samples.

#### Genome browser session (e.g. [UCSC](#))

We can provide BAM and BED files for the genome browser session upon request.

### Methodology

#### Replicates

Two biological replicates were used for each of the N-term and C-term FLAG JUNB. Only peaks that overlapped between the two FLAG versions were included for analysis

#### Sequencing depth

>60 million paired end reads were obtained for each sample. Samples had >85% alignment rate to the hg38 human genome.

#### Antibodies

anti-FLAG (Millipore Sigma F3165-1MG)

#### Peak calling parameters

MACS was run with command line options “-g hs -B -S --mfold 6,30”

#### Data quality

MACS was used to identify peaks and only peaks within 10kb of the transcriptional start site of genes were analyzed for overlap with RNA-seq.

#### Software

MACS and Python were used to analyze the data. Code will be provided upon request.

## Flow Cytometry

### Plots

Confirm that:

- The axis labels state the marker and fluorochrome used (e.g. CD4-FITC).
- The axis scales are clearly visible. Include numbers along axes only for bottom left plot of group (a 'group' is an analysis of identical markers).
- All plots are contour plots with outliers or pseudocolor plots.
- A numerical value for number of cells or percentage (with statistics) is provided.

### Methodology

#### Sample preparation

Per condition, 500,000 cells were pelleted, washed with PBS, and fixed in 4% formaldehyde at 4C for 10 mins. Cells were washed twice with PBS and resuspended in PBS with the appropriate protein or antibody. Cells were incubated at 4C for 1h. Cells were washed with PBS and resuspended in PBS with the appropriate secondary antibody where applicable. Cells were incubated at 4C for 30 mins. Cells were washed twice with PBS before flow cytometry analysis. Please see the methods section for more details

#### Instrument

CytoFLEX Flow Cytometer (Beckman Coulter)

#### Software

FlowJo

#### Cell population abundance

Post-sort fractions were not analyzed.

#### Gating strategy

For each experiment, the same gating strategy for FSC/SSC was applied to all samples in a blinded manner. The median fluorescence intensities for each biological replicate are reported, with no additional gating.

- Tick this box to confirm that a figure exemplifying the gating strategy is provided in the Supplementary Information.
